# Supplementary material for: Polylactic acid as a suitable material for 3D printing of protective masks in times of COVID-19 pandemic
Source: PubMed Central journal article supplement (PMC7603793; doi:10.7717/peerj.10259), 2020-10-29

# control sample

## spot 1

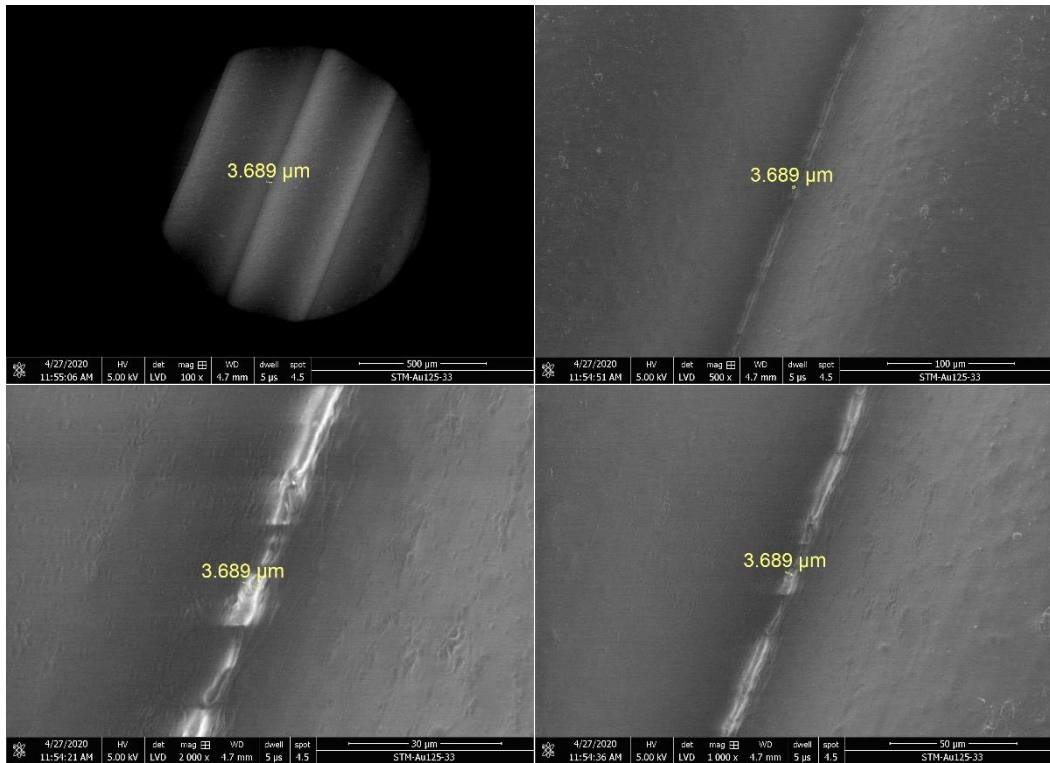

## spot 2

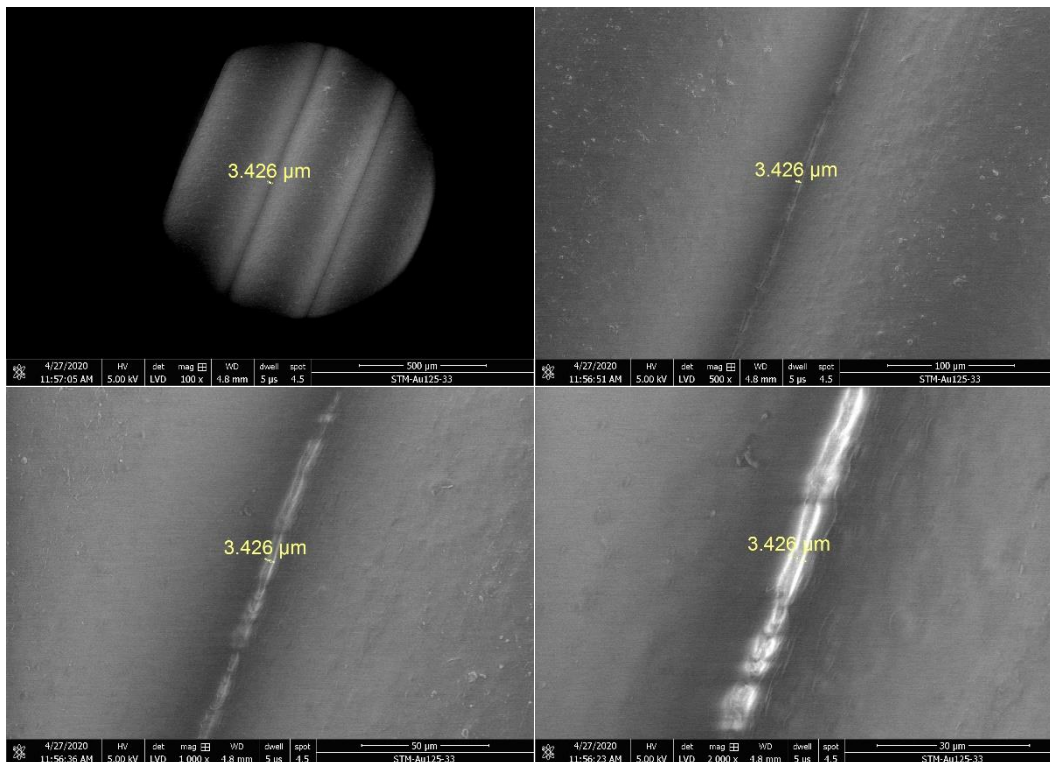

spot 3

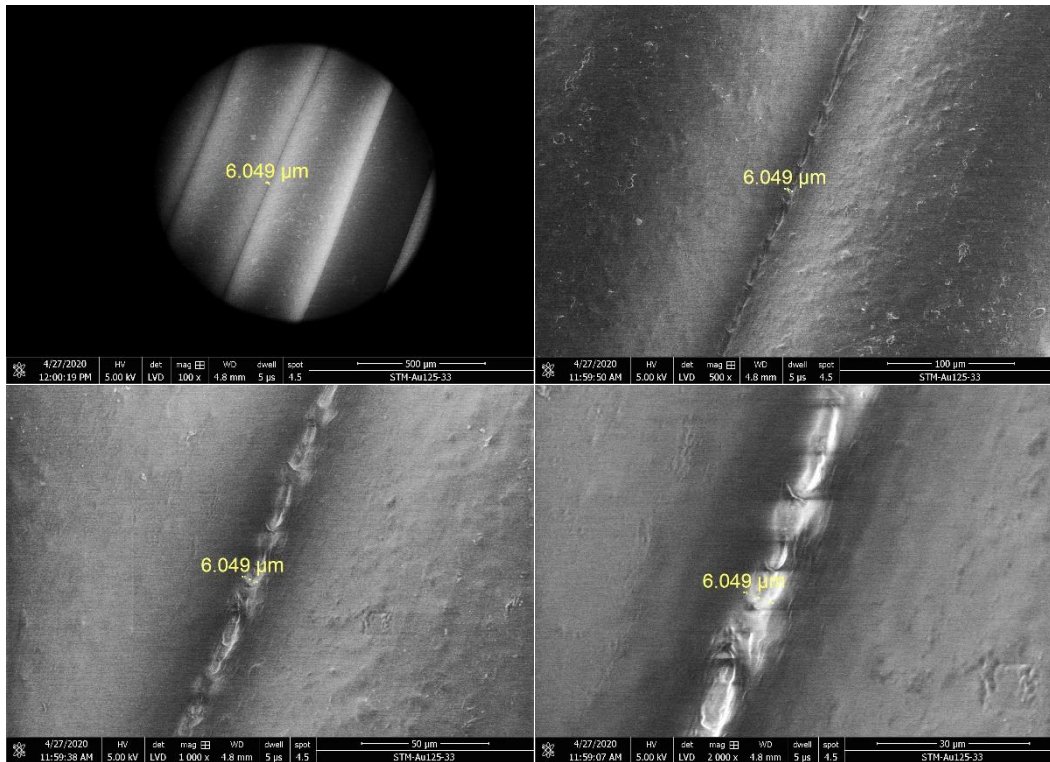

ethanol 5x15 min

spot 1

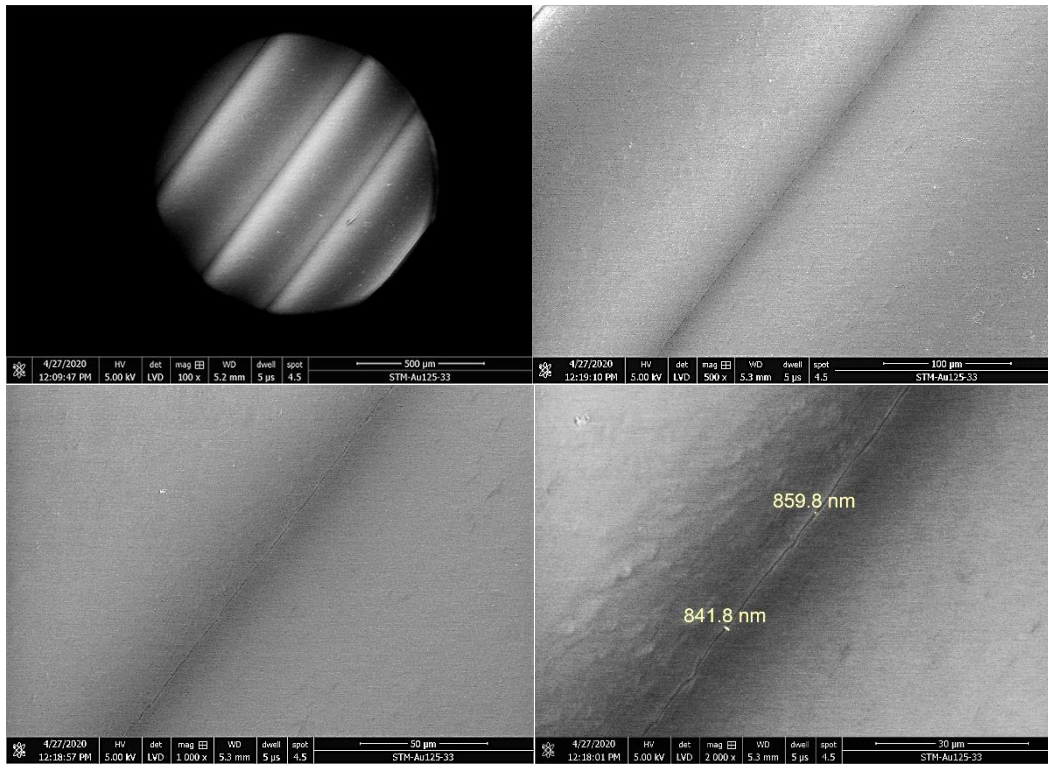

spot 2

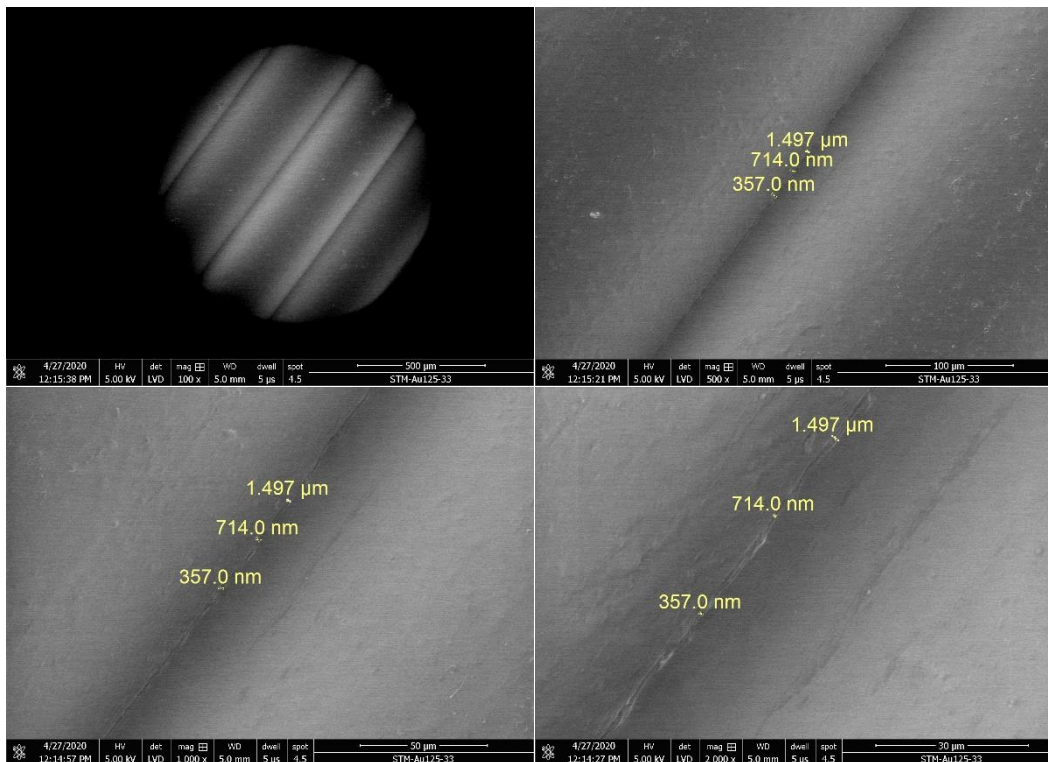

spot 3

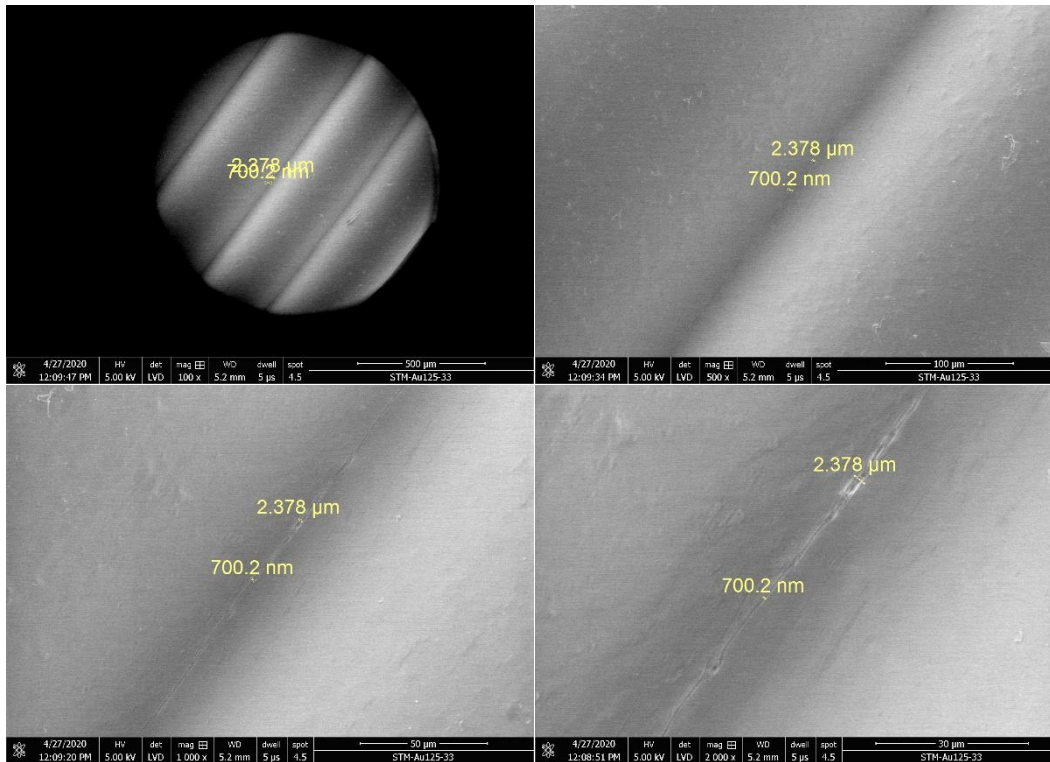

# isopropanol 5x15 min

## spot 1

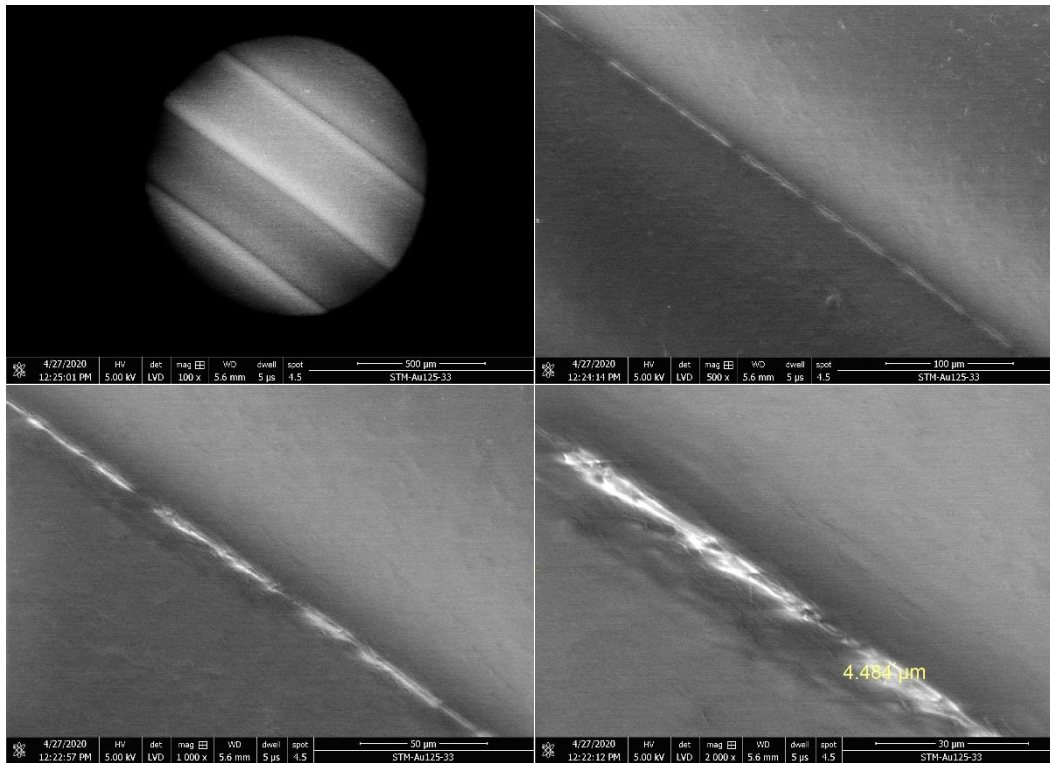

## spot 2

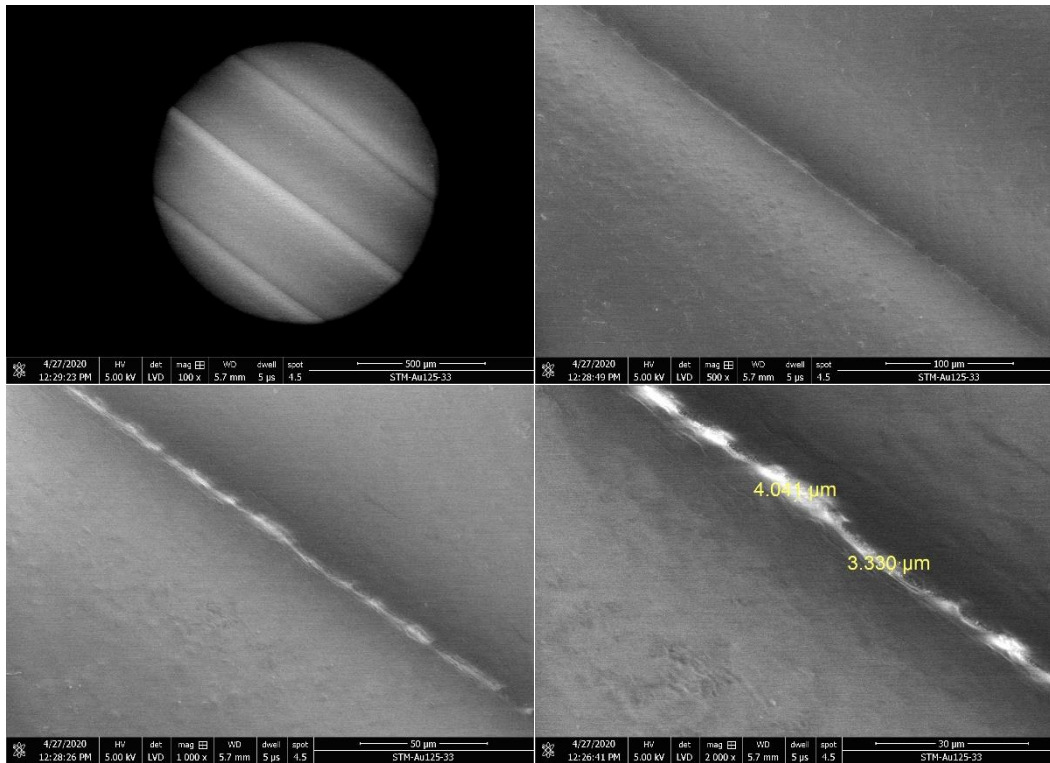

spot 3

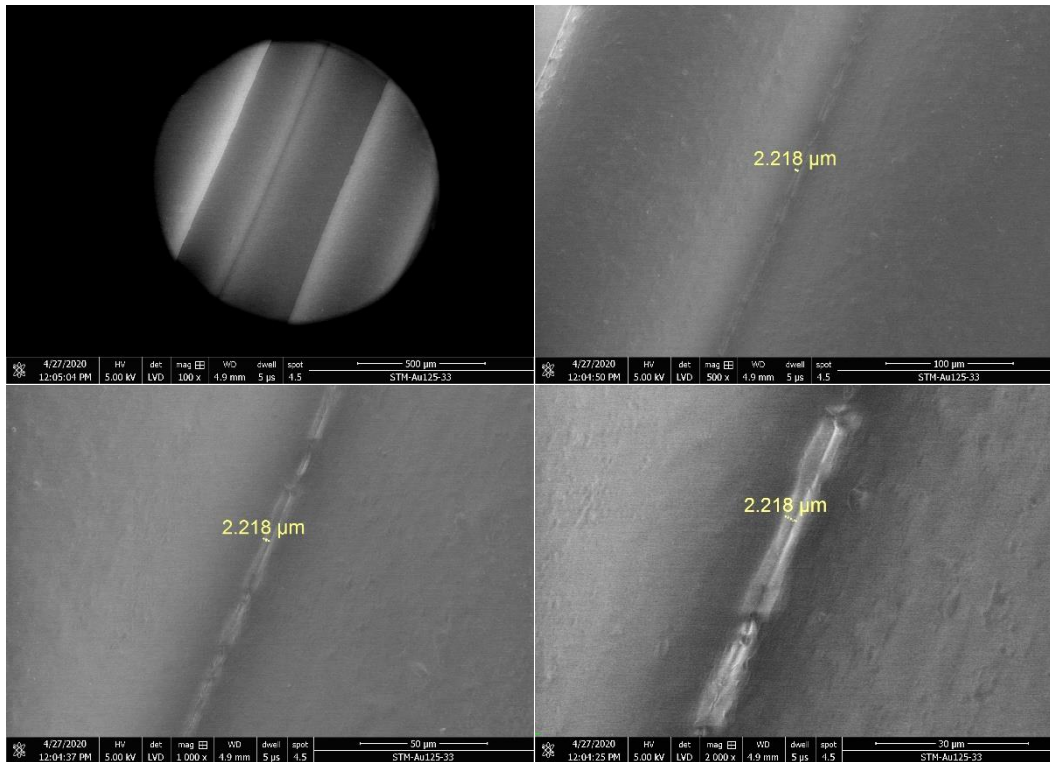

# sodium hypochlorite 5x15 min

## spot 1

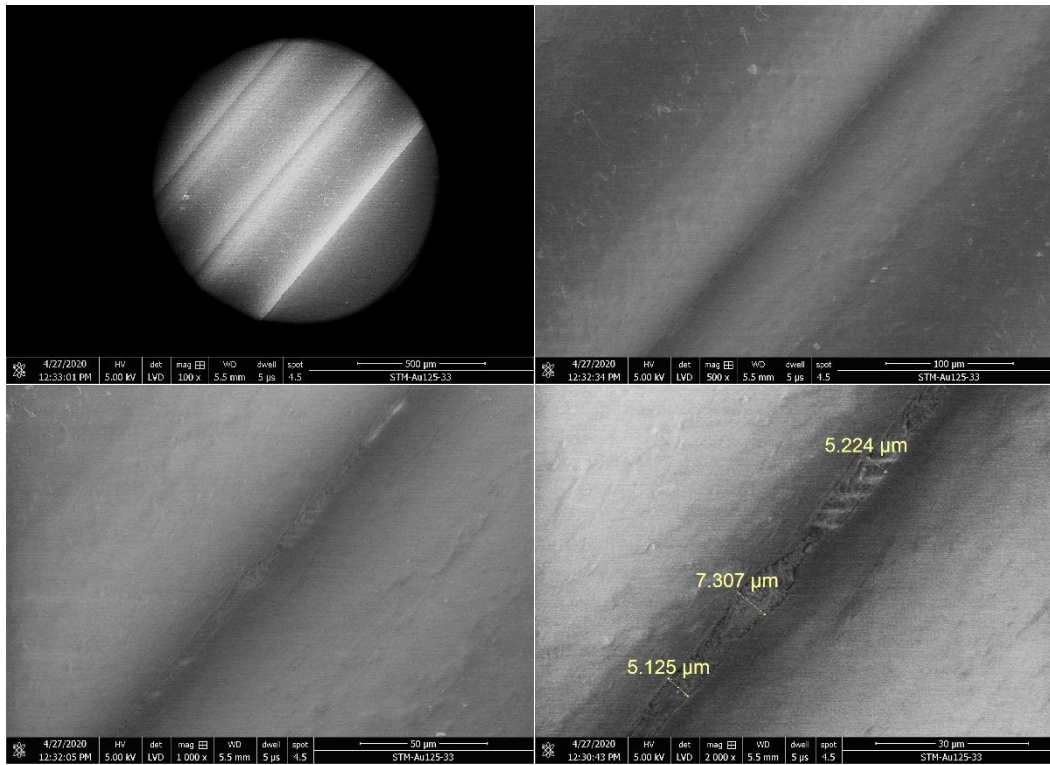

## spot 2

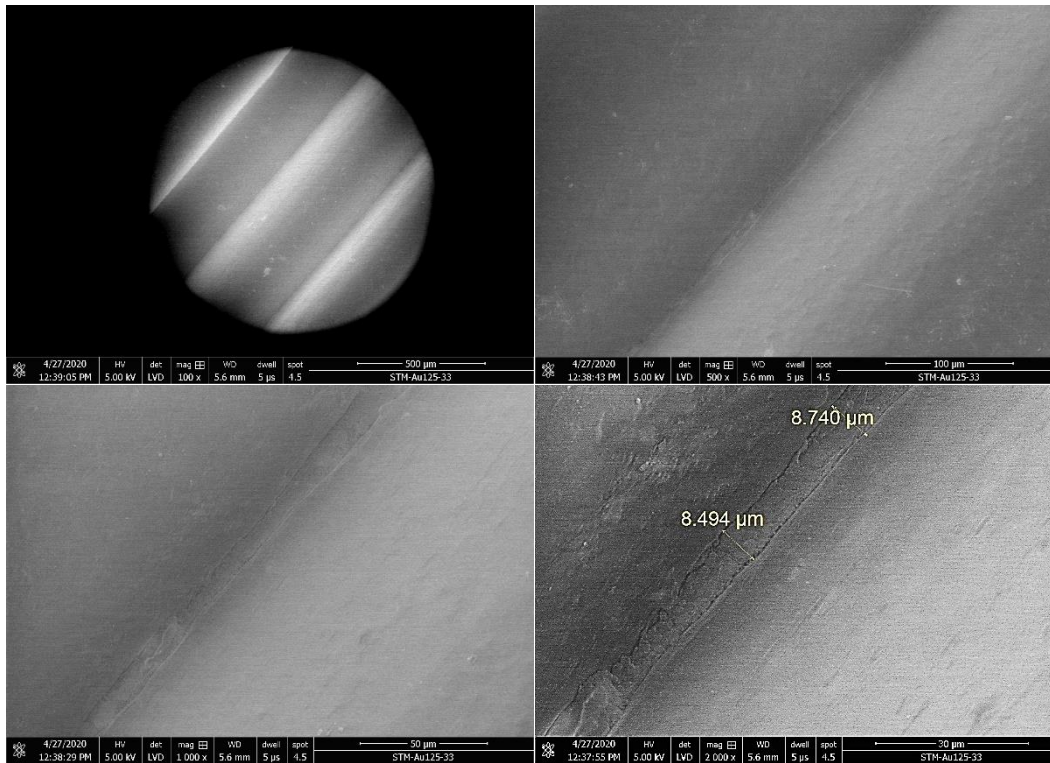

spot 3

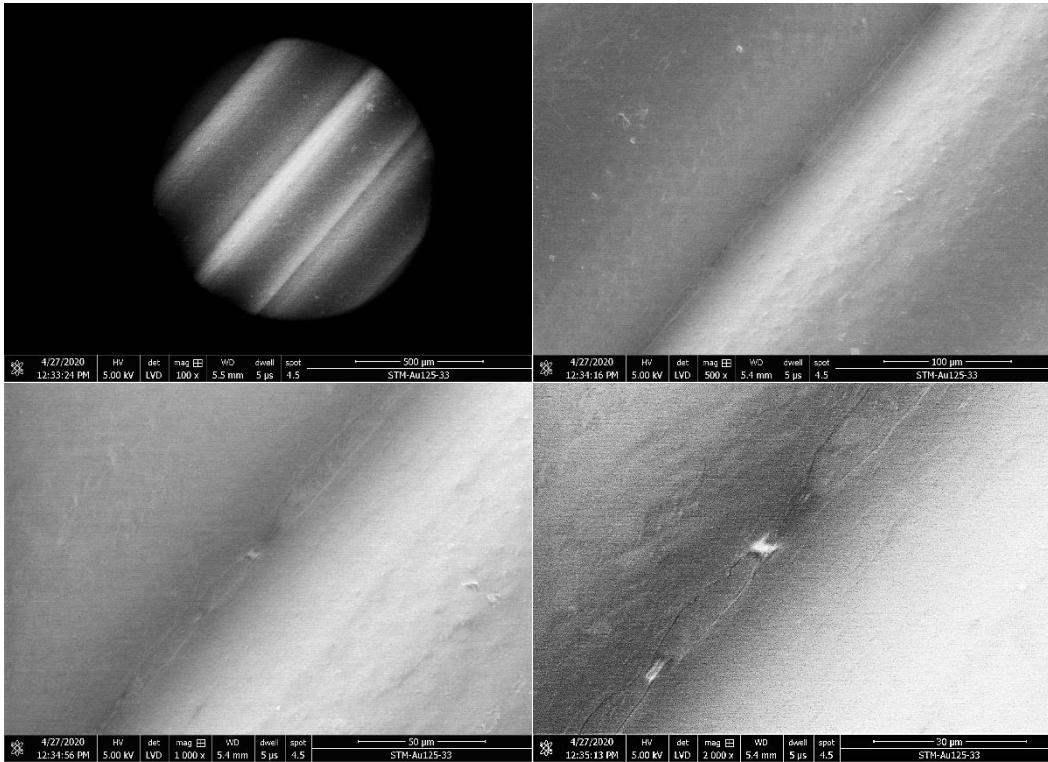



# ethanol 24 h

## spot 1

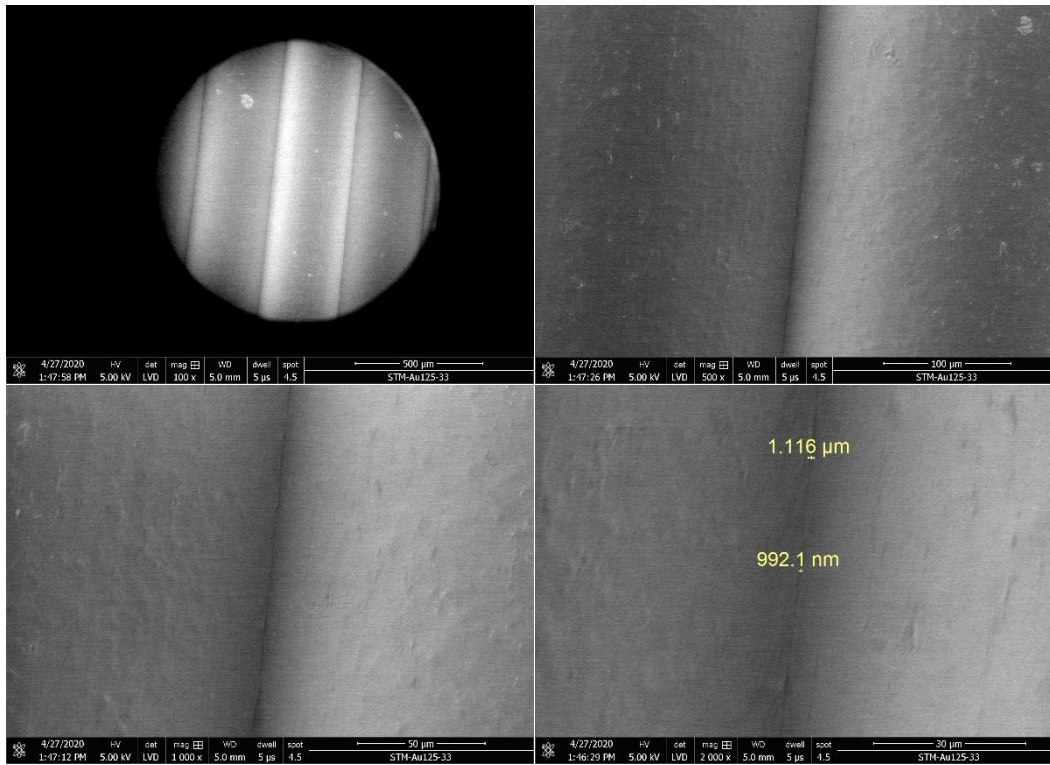

## spot 2

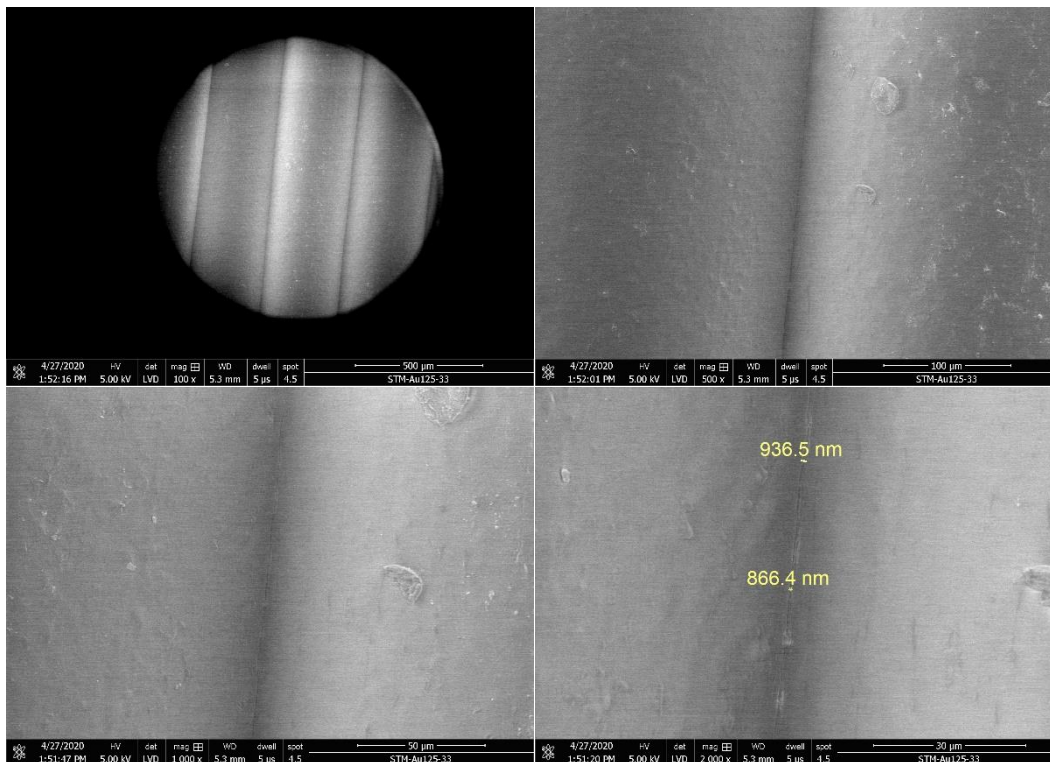

spot 3

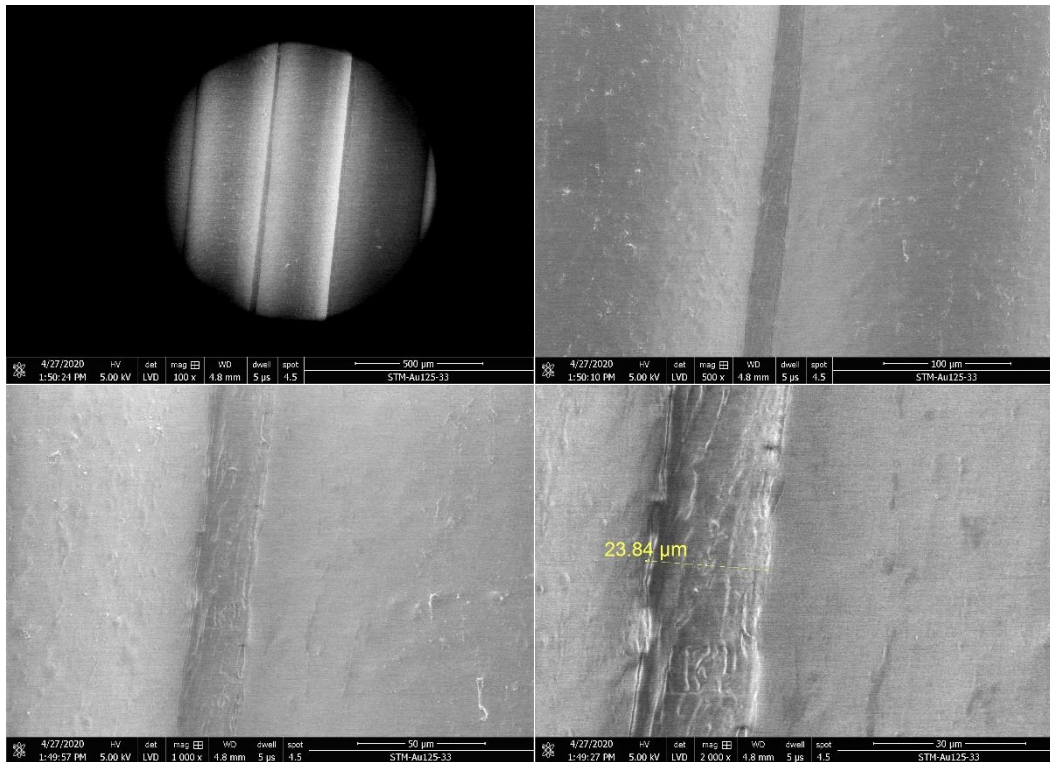

# isopropanol 24 h

## spot 1

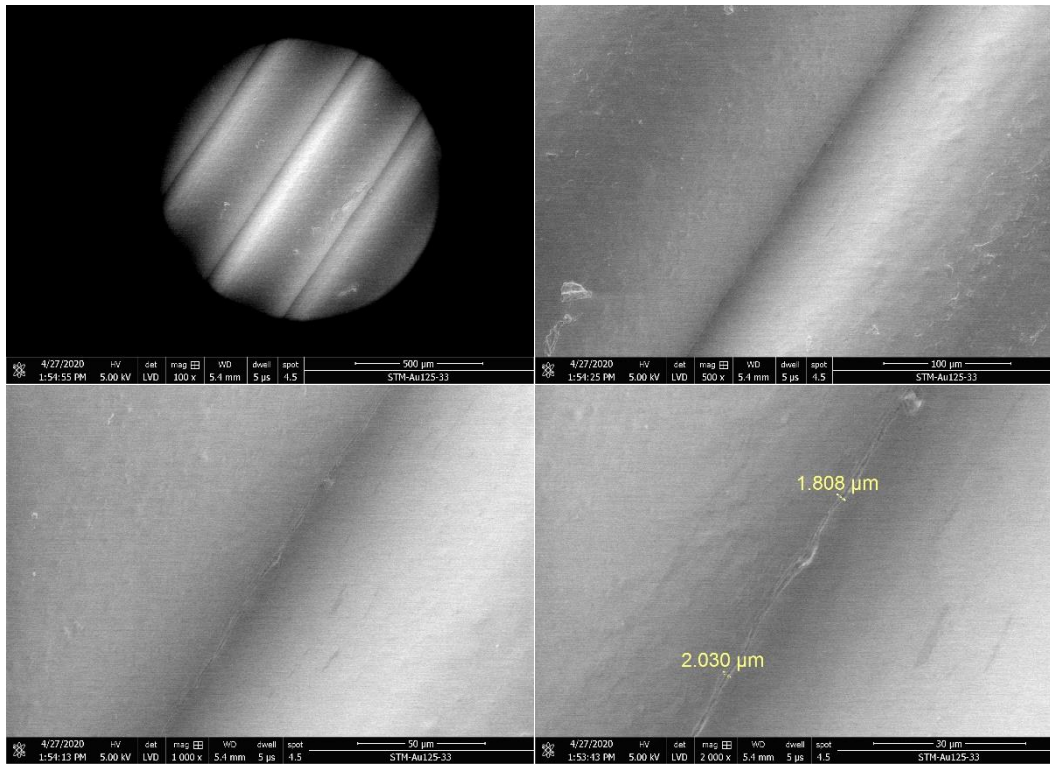

## spot 2

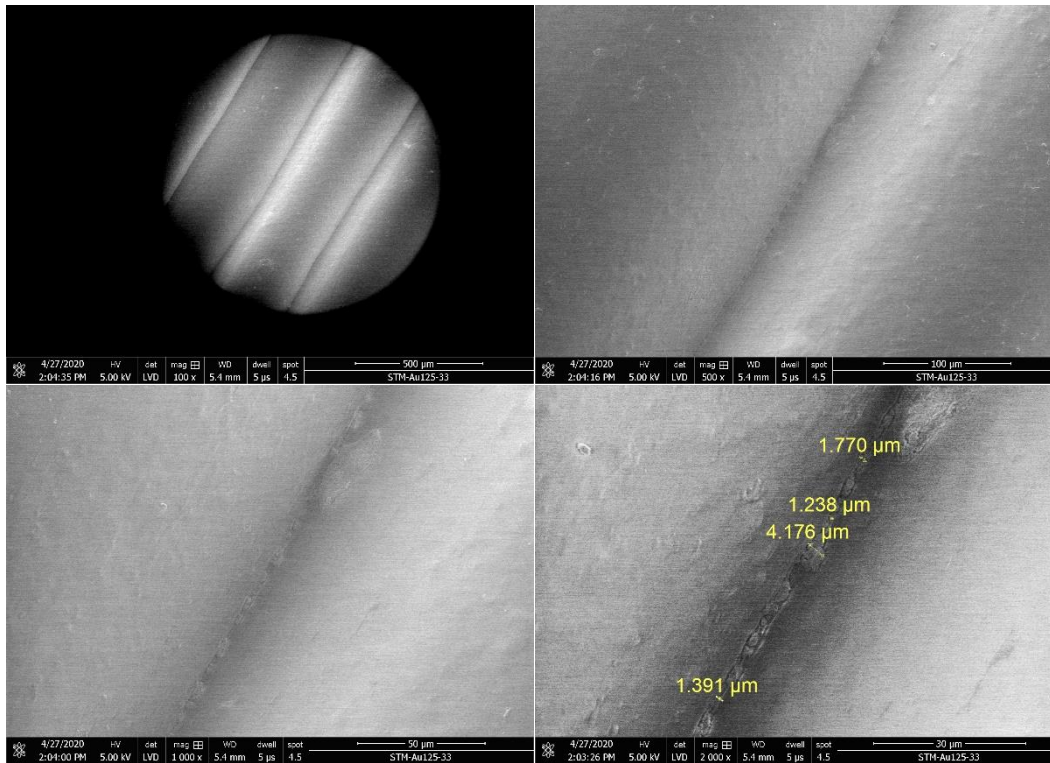

spot 3

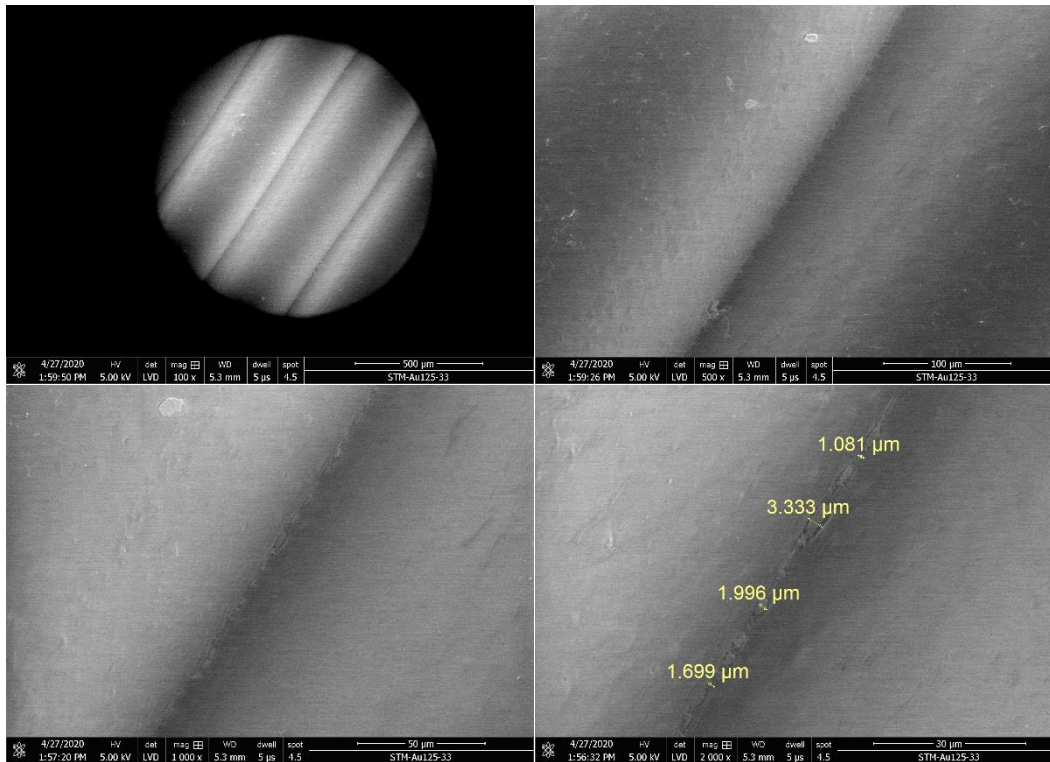

# sodium hypochlorite 24 h

spot 1

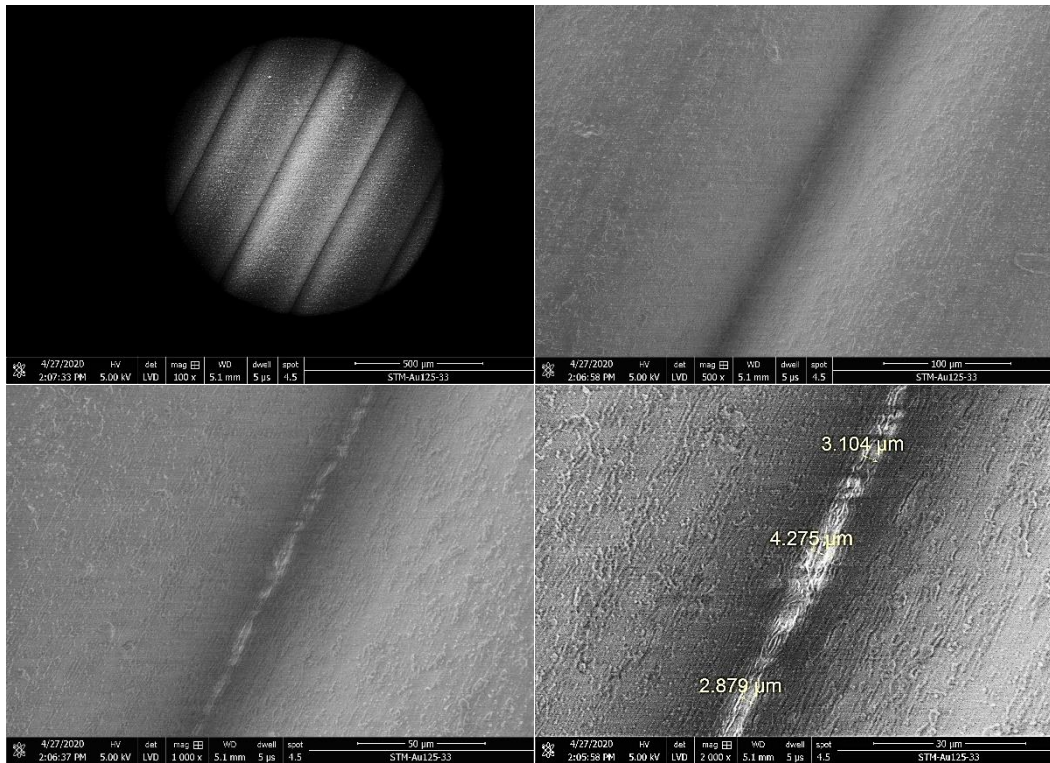

spot 2

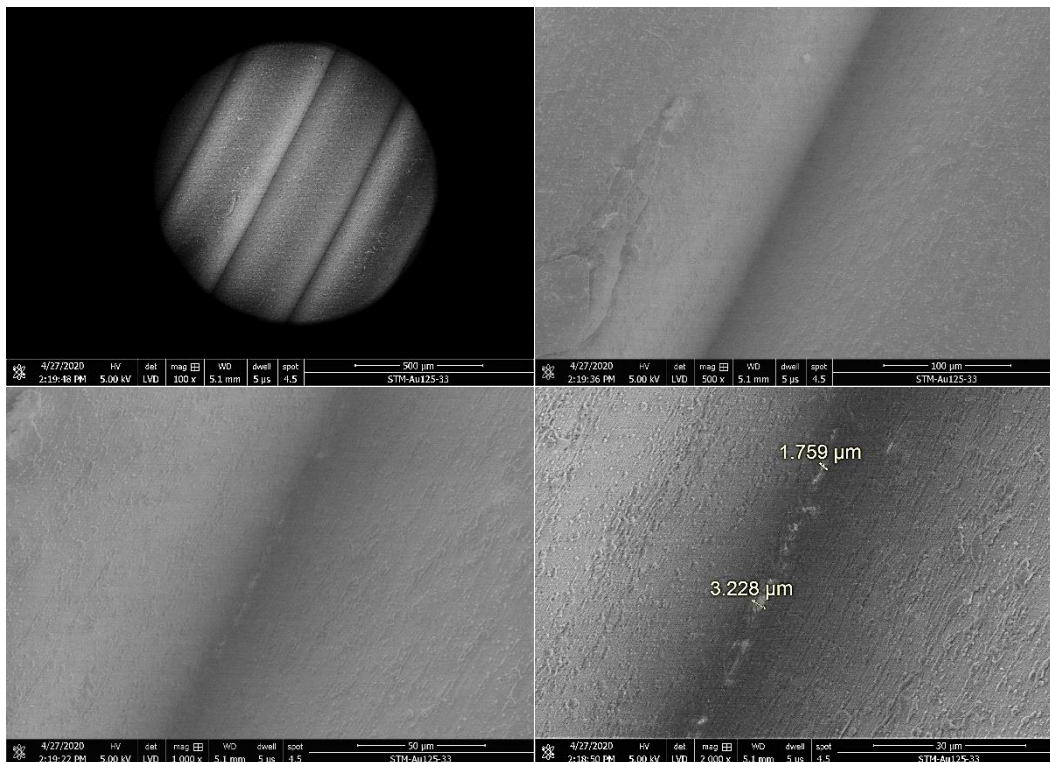

spot 3

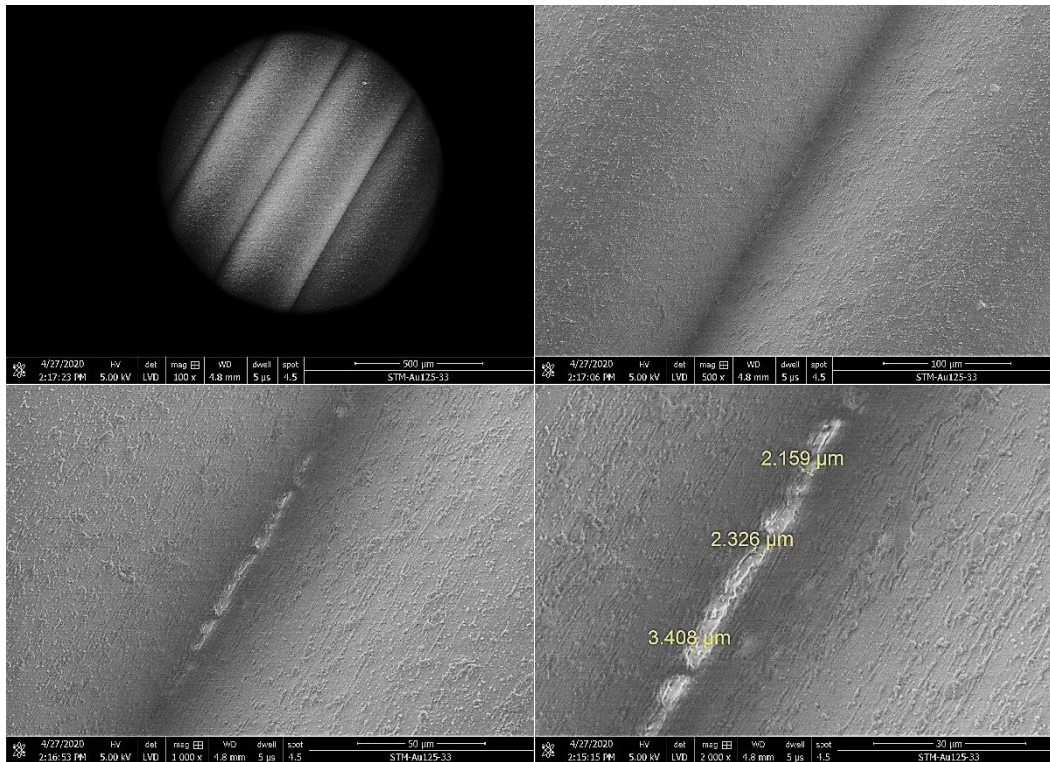

Supplement: peerj-08-10259-s011.pdf [file peerj-08-10259-s011.pdf]
