# Supplementary material for: Polylactic acid as a suitable material for 3D printing of protective masks in times of COVID-19 pandemic
Source: PubMed Central journal article supplement (PMC7603793; doi:10.7717/peerj.10259), 2020-10-29

# SARS-CoV-2 brightfield

SAVO 2:9

96% EtOH

70% isopropanol

control

dilution 1:2.5

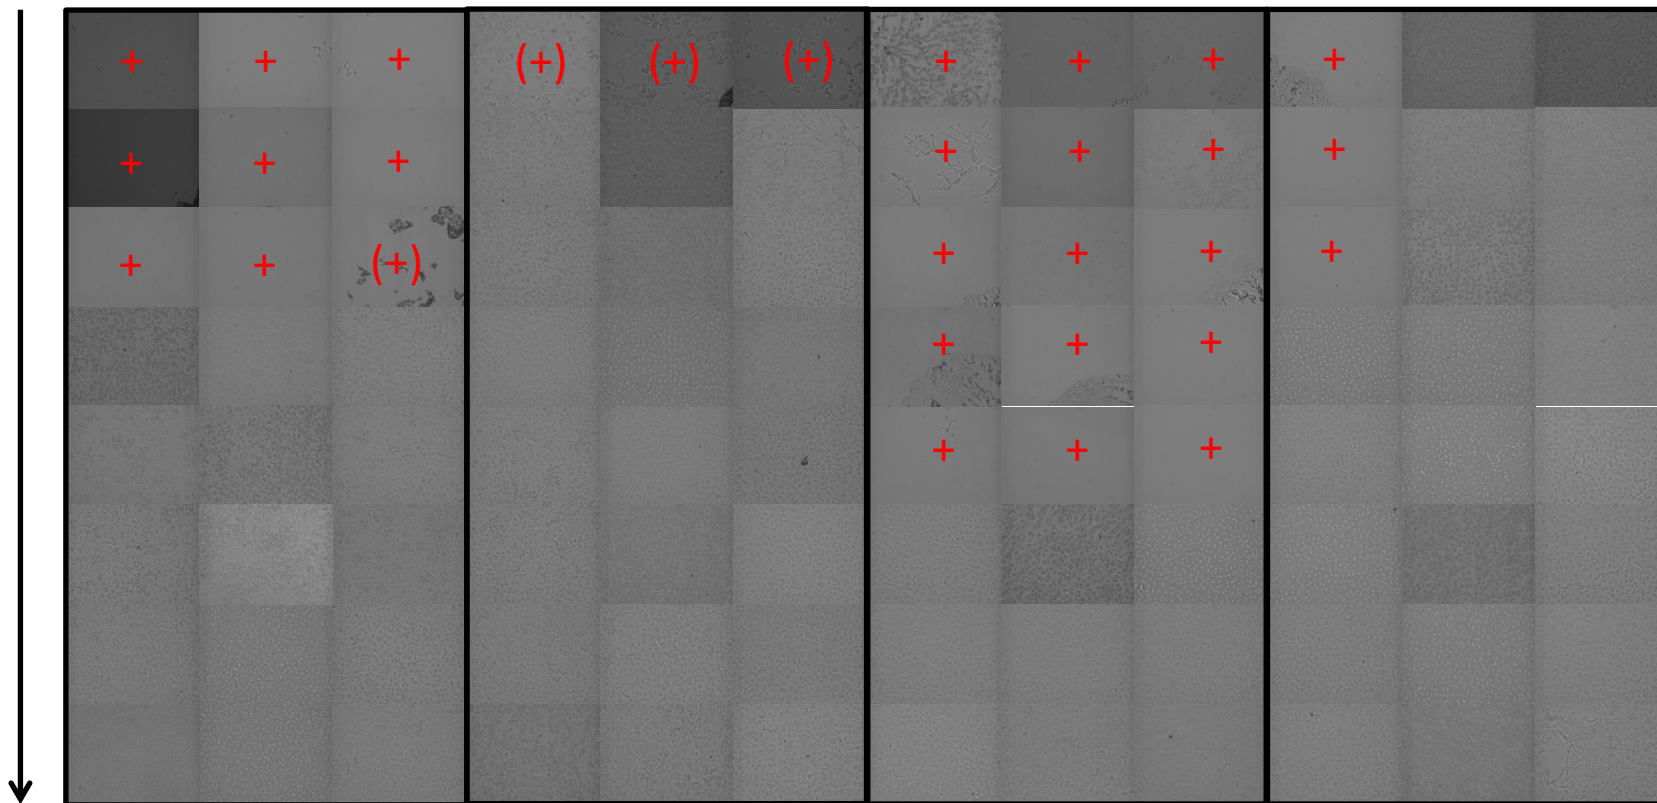

Cell detachment

# SARS-CoV-2 Texas Red

SAVO 2:9

96% EtOH

70% isopropanol

control

dilution 1:2.5

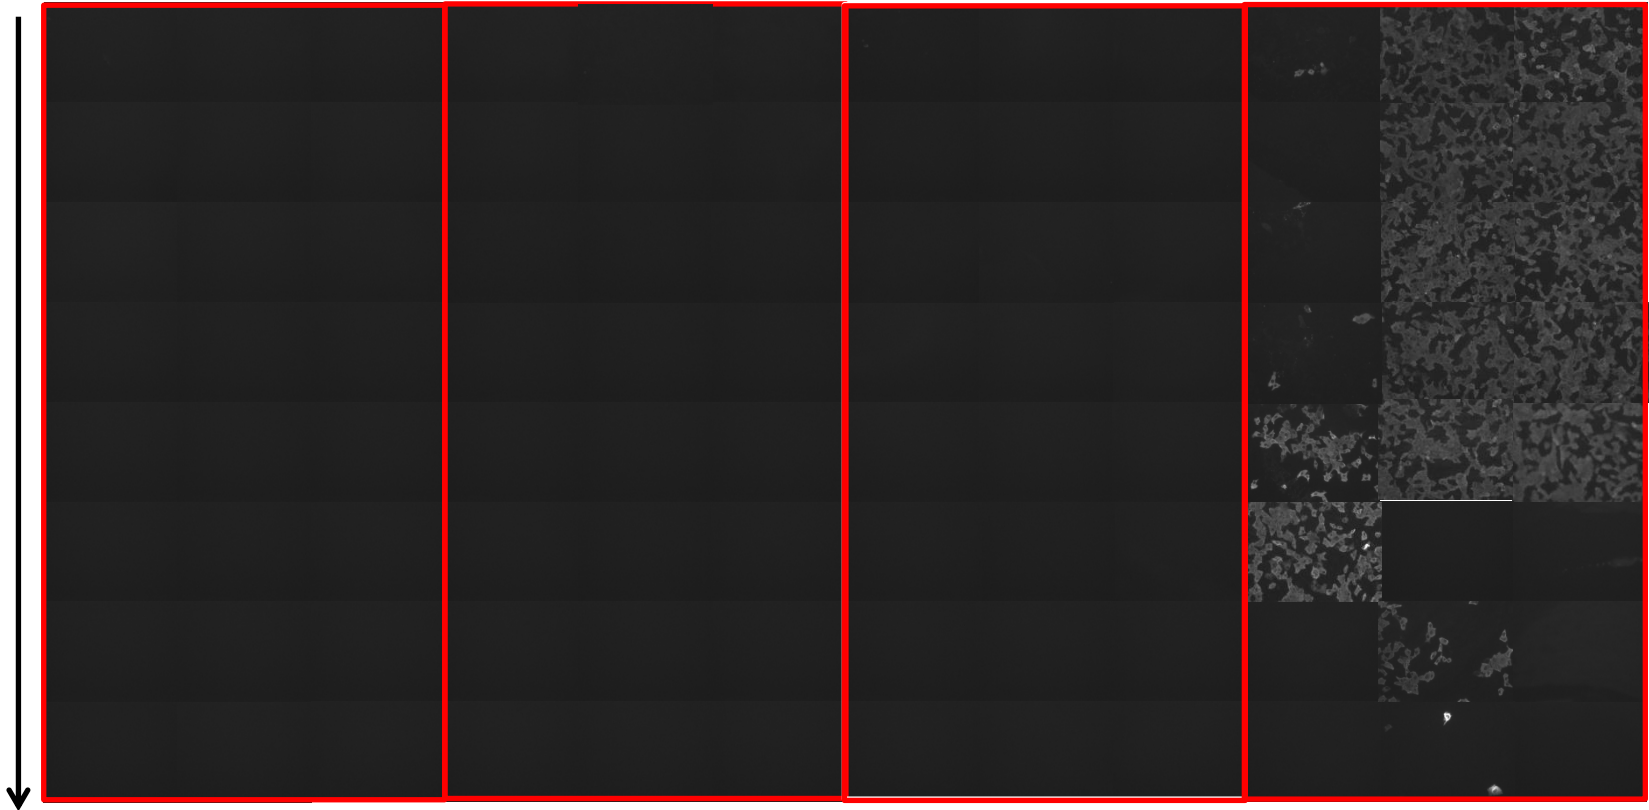

Supplement: peerj-08-10259-s009.pdf [file peerj-08-10259-s009.pdf]
